# Supplementary material for: Sequence effect on the self-assembly of discrete amphiphilic co-oligomers with fluorene-azobenzene semirigid backbones
Source: Royal Society of Chemistry journal article supplement (doi:10.1039/d3ra04205g), 2023-01-01
Supplement: d3ra04205g1.pdf [file d3ra04205g1.pdf]

## Supporting Information

### **Sequence effect on self-assembly of discrete amphiphilic copolyoligomers with fluorene-azobenzene semirigid backbones**

Liandong Ye, § Min Liu, § Xiao Wang, Zhihong Yu, Zhihao Huang, Wei Zhang, Nianchen Zhou,\* Zhengbiao Zhang\* and Xiulin Zhu

Suzhou Key Laboratory of Macromolecular Design and Precision Synthesis, Jiangsu Key Laboratory of Advanced Functional Polymer Design and Application, State and Local Joint Engineering Laboratory for Novel Functional Polymeric Materials, College of Chemistry, Chemical Engineering and Materials Science, Soochow University, Suzhou, 215123, P. R. China

§Authors L. Ye and M. Liu contributed equally to this work.

Supporting Information for this article is given via a link at the end of the document.

E-mail: nczhou@suda.edu.cn; zhangzhengbiao@suda.edu.cn

## Experimental Procedures

### Synthesis

Synthesis of the fluorene monomer TBS-F-NH<sub>2</sub> and azobenzene monomer TBS-Azo-Br-2Boc.

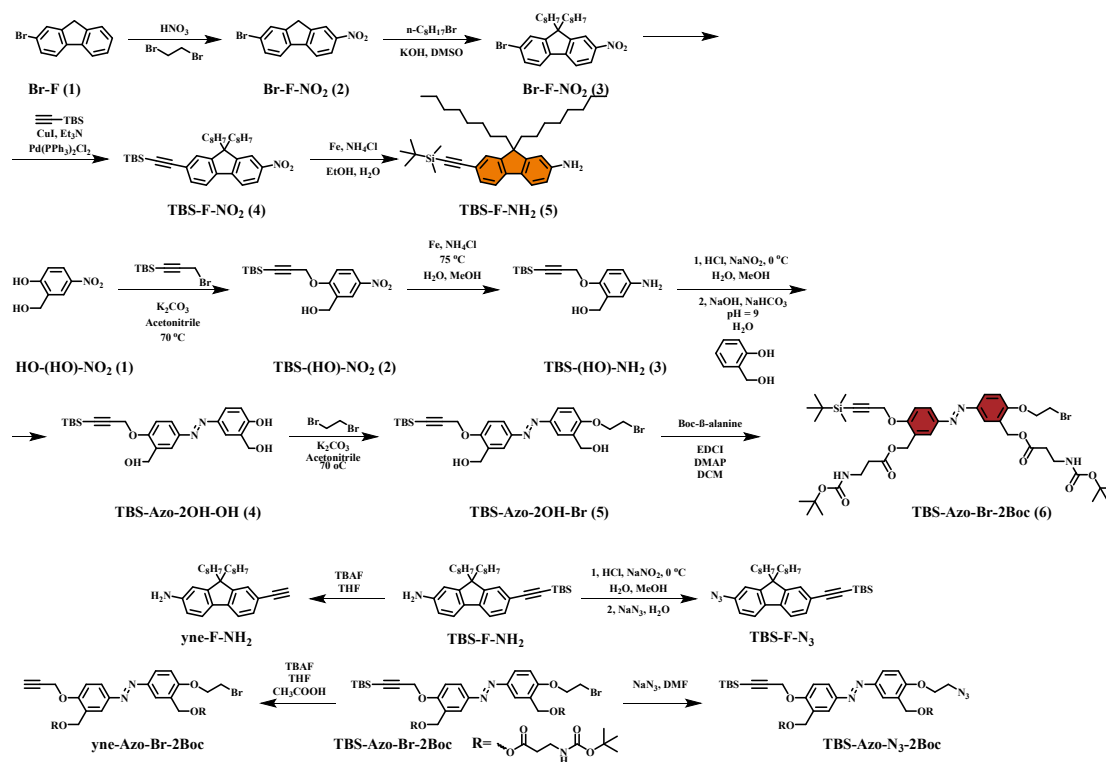

**Scheme S1.** The synthetic routes of fluorene monomer TBS-F-N<sub>3</sub> and azobenzene monomer TBS-Azo-Br-2Boc.

The synthetic routes of the both monomers of fluorene TBS-F-NH<sub>2</sub> and azobenzene TBS-Azo-Br-2Boc were shown in **Scheme S1**, and synthetic process was conducted according to a previous literature.<sup>[S1, S2]</sup> TBS-F-N<sub>3</sub> was obtained as a brown solid. <sup>1</sup>H NMR (300 MHz, CDCl<sub>3</sub>) δ (TMS, ppm): 7.60-7.10 (m, 4H, ArH), 6.91-6.66 (m, 2H, ArH), 1.8-1.61 (m, 4H, -C-CH<sub>2</sub>-CH<sub>2</sub>-), 1.09-0.73 (m, 29H, -CH<sub>2</sub>-, -Si-(CH<sub>3</sub>)<sub>3</sub>), 0.68-0.54 (m, 6H, -CH<sub>3</sub>), 0.34 (d, 4H, -CH<sub>2</sub>-), 0.07-0.05 (m, 6H, -Si-CH<sub>3</sub>). <sup>1</sup>H NMR spectrum and LCMS of TBS-F-N<sub>3</sub> are presented in Figure S1.

TBS-Azo-Br-2Boc was produced to yield as a yellow solid. <sup>1</sup>H NMR (300 MHz, CDCl<sub>3</sub>), δ (TMS, ppm): 7.90-7.70 (m, 4H, ArH), 7.07 (d, 1H, ArH), 6.87 (d, 1H, ArH), 5.17 (d, 4H, -CH<sub>2</sub>-OH), 5.06 (s, 2H, -C-CH<sub>2</sub>-O), 4.73 (s, 2H, -CH<sub>2</sub>), 4.30 (t, 2H, -CH<sub>2</sub>), 3.33 (q, 4H, -CH<sub>2</sub>-NH), 2.52 (td, 4H, -COO-CH<sub>2</sub>-), 1.32 (s, 18H, -CH<sub>3</sub>), 0.79 (s, 9H, -Si-(CH<sub>3</sub>)<sub>3</sub>), 0.08 (s, 6H, -

Si-CH<sub>3</sub>). <sup>1</sup>H NMR spectrum is presented in Figure S2.

Synthesis of fluorene blocks (TBS-2F-NH<sub>2</sub>, TBS-4F-NH<sub>2</sub>) and azobenzene blocks (TBS-2Azo-Br-4Boc, TBS-4Azo-Br-8Boc)

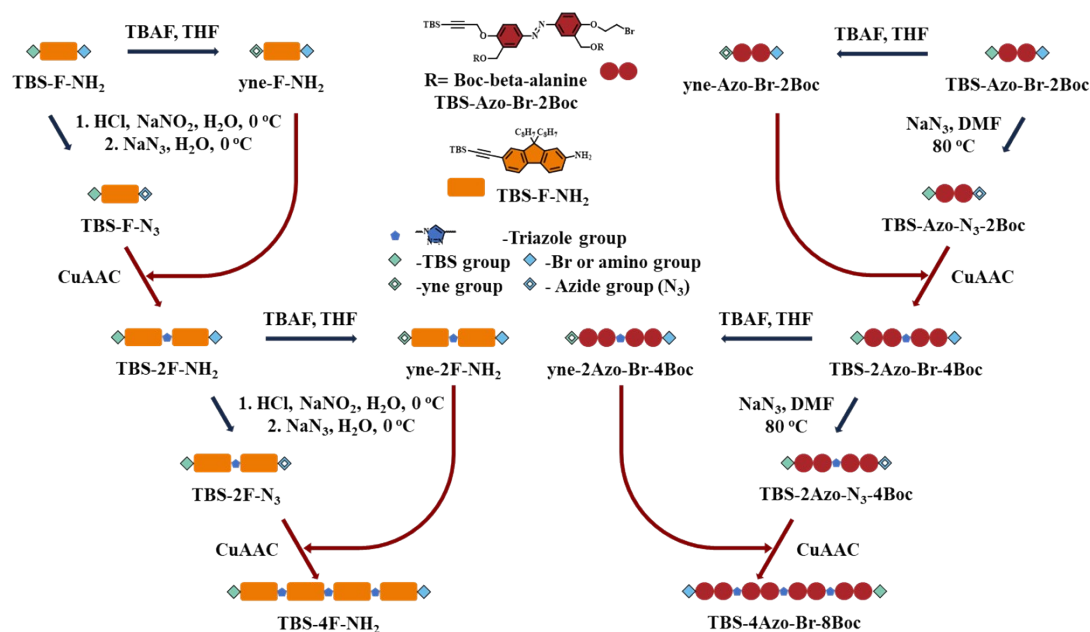

**Scheme S2.** Schematic diagram of the synthetic routes of fluorene blocks, TBS-2F-NH<sub>2</sub> and TBS-4F-NH<sub>2</sub>, and azobenzene blocks, TBS-2Azo-Br-4Boc and TBS-4Azo-Br-8Boc.

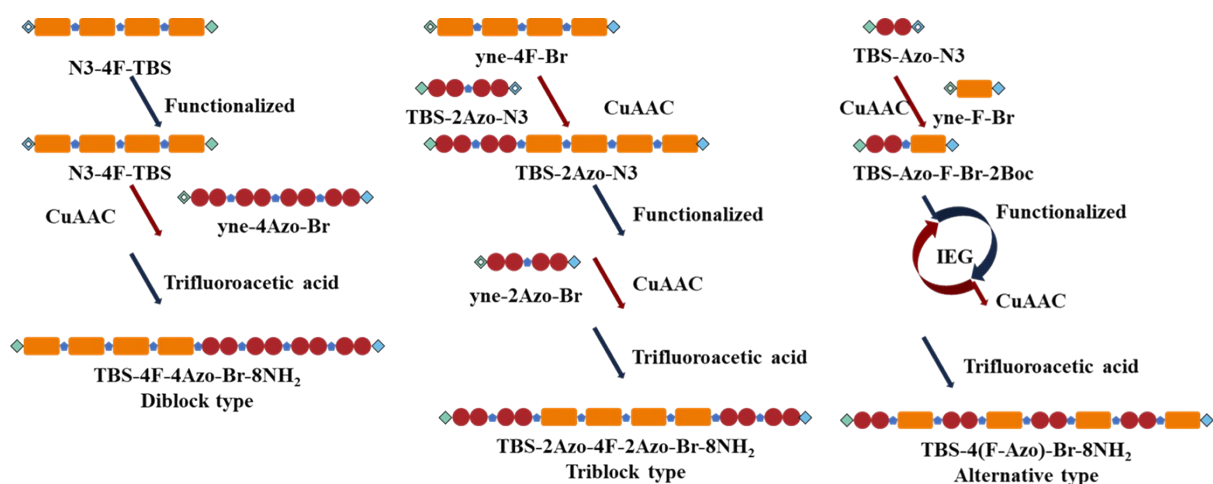

**Scheme 3.** Schematic diagram of synthetic routes of three sequence isomeric oligomers of 4F-4Azo-8NH<sub>2</sub>, 2Azo-4F-2Azo-8NH<sub>2</sub> and 4(F-Azo)-8NH<sub>2</sub>

## Synthesis of TBS-2F-NH<sub>2</sub> and TBS-4F-NH<sub>2</sub>

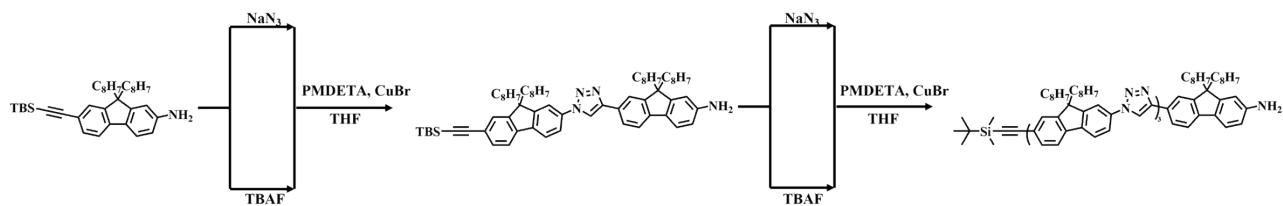

**Scheme S4.** The synthetic routes of fluorene blocks TBS-2F-NH<sub>2</sub> and TBS-4F-NH<sub>2</sub>

## Synthesis of azobenzene blocks TBS-2Azo-Br-4Boc and TBS-4Azo-Br-8Boc

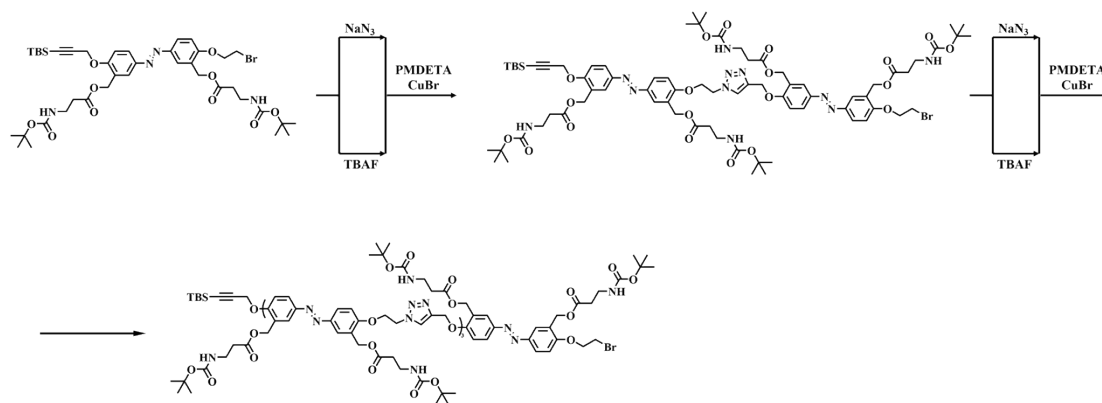

**Scheme S5.** Synthetic route of TBS-2Azo-Br-4Boc and TBS-4Azo-Br-8Boc.

## Synthesis of TBS-2Azo-Br-4Boc and TBS-4Azo-Br-8Boc

<sup>1</sup>H NMR spectra, MALDI-TOF spectra of TBS-2Azo-Br-4Boc and TBS-4Azo-Br-8Boc are presented in Figures S3(a) and (b), and GPC elution curves of TBS-Azo-Br-2Boc, TBS-2Azo-Br-4Boc and TBS-4Azo-Br-8Boc are presented in Figures S3(c), and IR spectra of TBS-Azo-Br-4Boc, TBS-2Azo-Br-4Boc and TBS-4Azo-Br-4Boc before and after azidation are presented in Figures S3(d).

## Additional Results

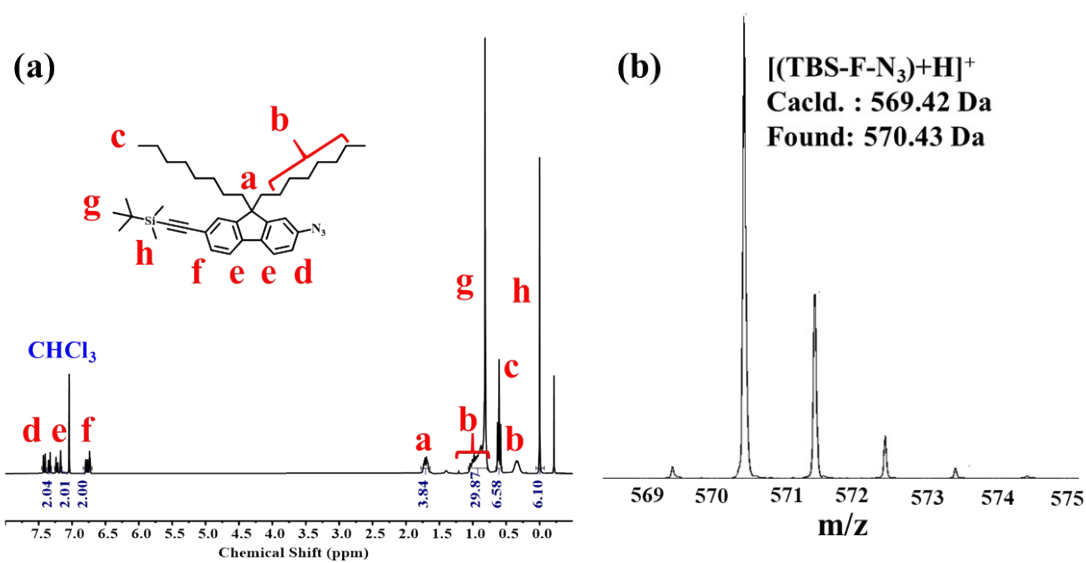

**Figure S1.** (a)  $^1\text{H}$  NMR spectrum of TBS-F-N<sub>3</sub> in CDCl<sub>3</sub>, (b) LCMS of TBS-F-N<sub>3</sub>.

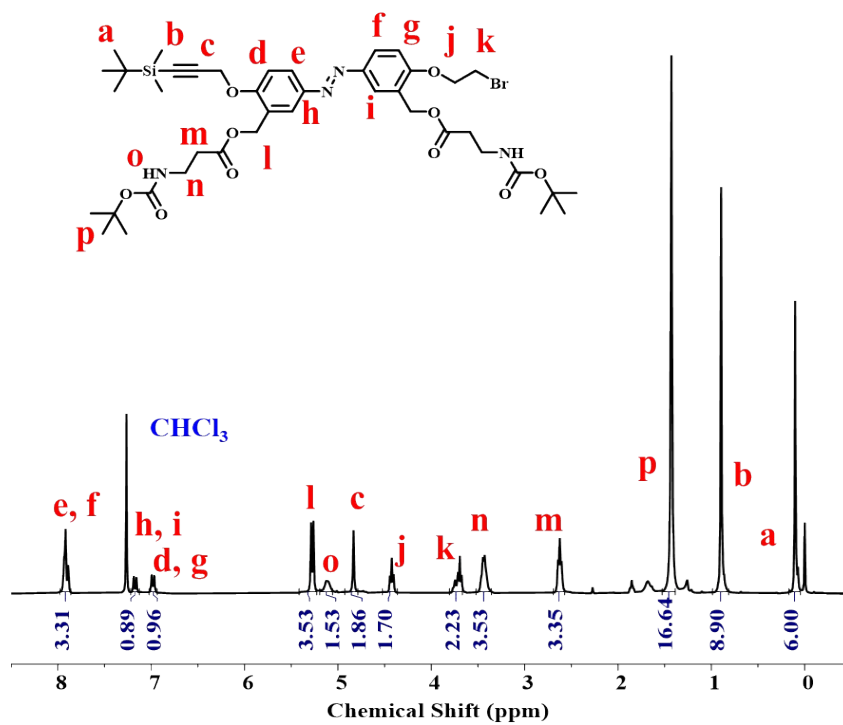

**Figure S2.**  $^1\text{H}$  NMR spectrum of TBS-Azo-Br-2Boc in CDCl<sub>3</sub>.

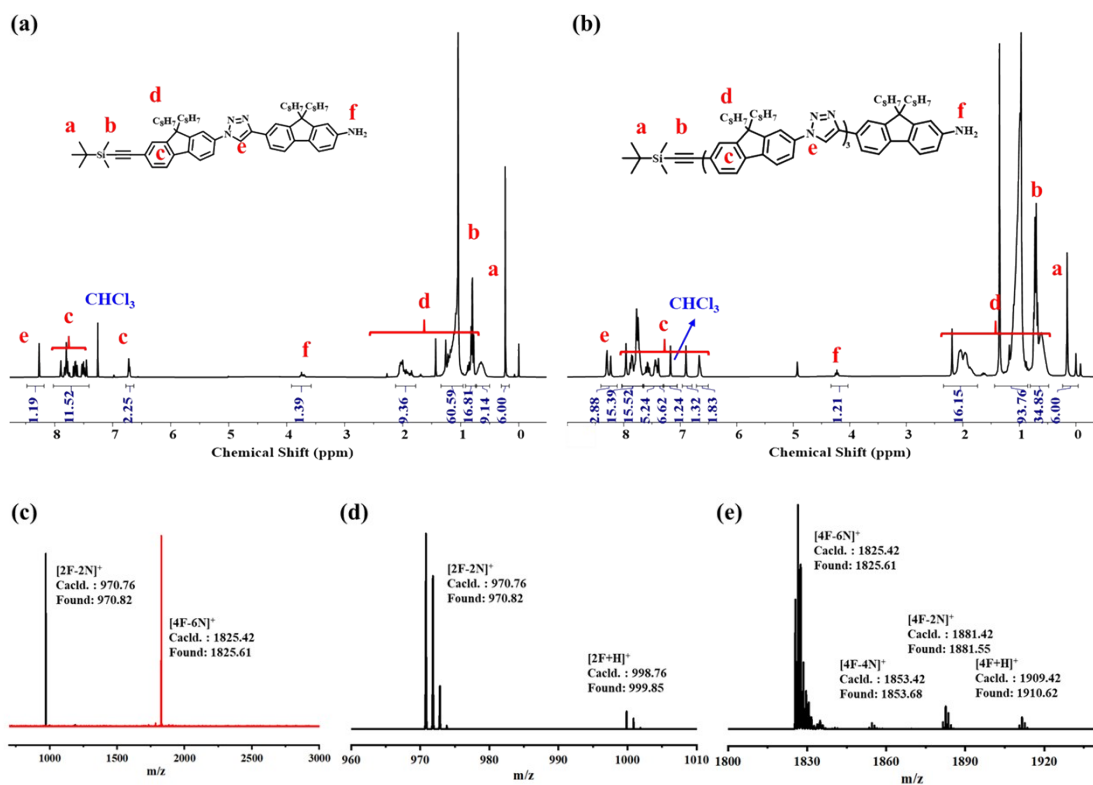

**Figure S3.** (a) <sup>1</sup>H NMR spectra of TBS-2F-NH<sub>2</sub> and TBS-4F-NH<sub>2</sub>; (b) MALDI-TOF spectra of TBS-2F-NH<sub>2</sub> and TBS-4F-NH<sub>2</sub>; (c) and (d) locally enlarged MALDI-TOF spectra of TBS-2F-NH<sub>2</sub> and TBS-4F-NH<sub>2</sub>

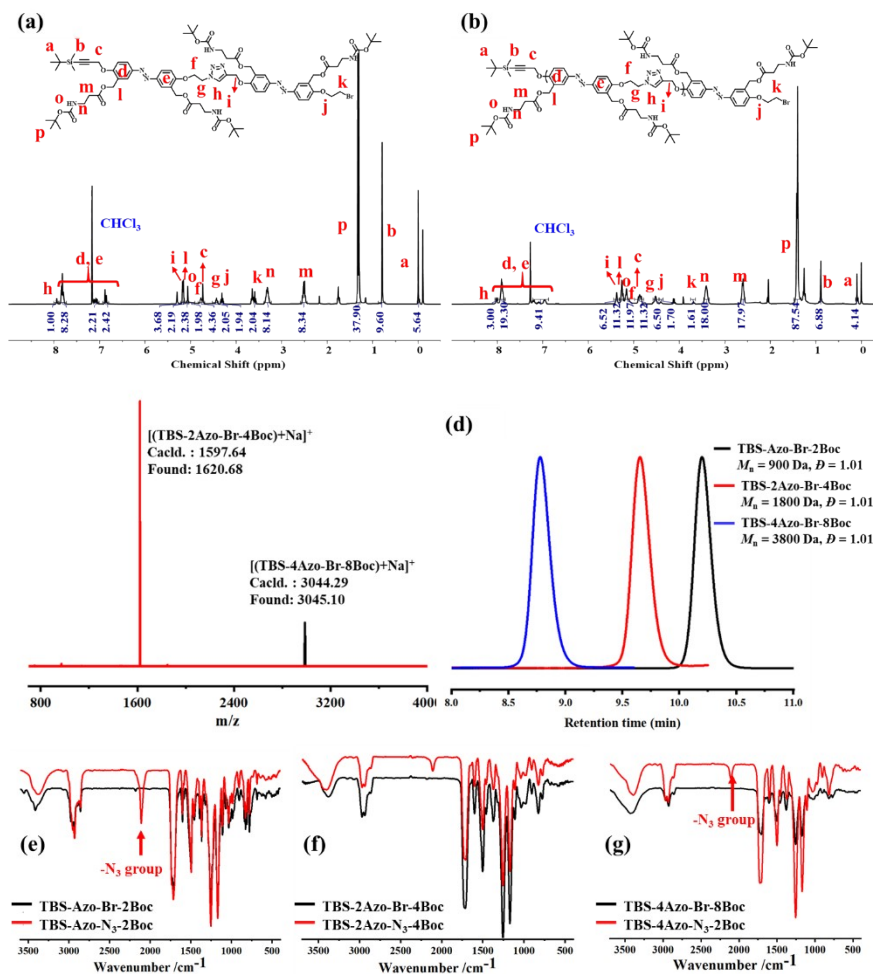

**Figure S4.** (a)  $^1\text{H}$  NMR spectra of TBS-2Azo-Br-4Boc and TBS-4Azo-Br-8Boc in  $\text{CDCl}_3$ ; (b) MALDI-TOF spectra of TBS-2Azo-Br-4Boc and TBS-4Azo-Br-8Boc; (c) GPC elution curves of TBS-Azo-Br-2Boc, TBS-2Azo-Br-4Boc and TBS-4Azo-Br-8Boc. (d) IR spectra of TBS-Azo-Br-2Boc, TBS-2Azo-Br-4Boc, TBS-4Azo-Br-8Boc before and after azidation.

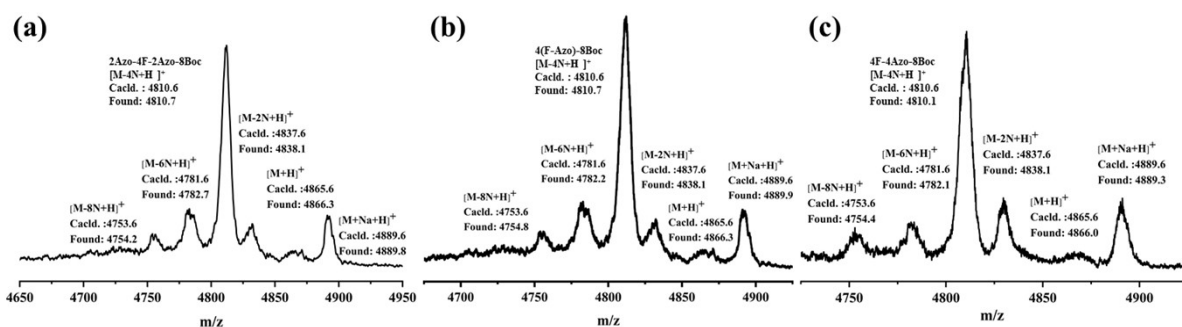

**Figure S5.** Partially enlarged MALDI-TOF spectra of (a) 2Azo-4F-2Azo-8Boc, (b) 4(F-Azo)-8Boc, (c) 4F-4Azo-8Boc.

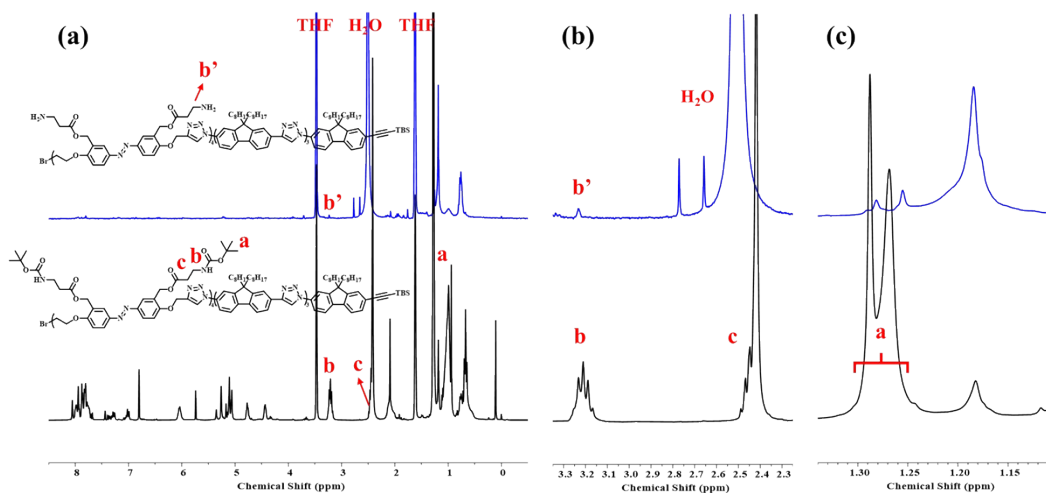

**Figure S6.** (a)  $^1\text{H}$  NMR spectra of 4F-4Azo-8Boc and 4F-4Azo-8NH<sub>2</sub> before and after hydrolysis in THF-*d*<sub>8</sub> and enlarged spectra in the range of (b) 3.3 ppm -2.3 ppm and (c) 1.4 ppm -1.1 ppm.



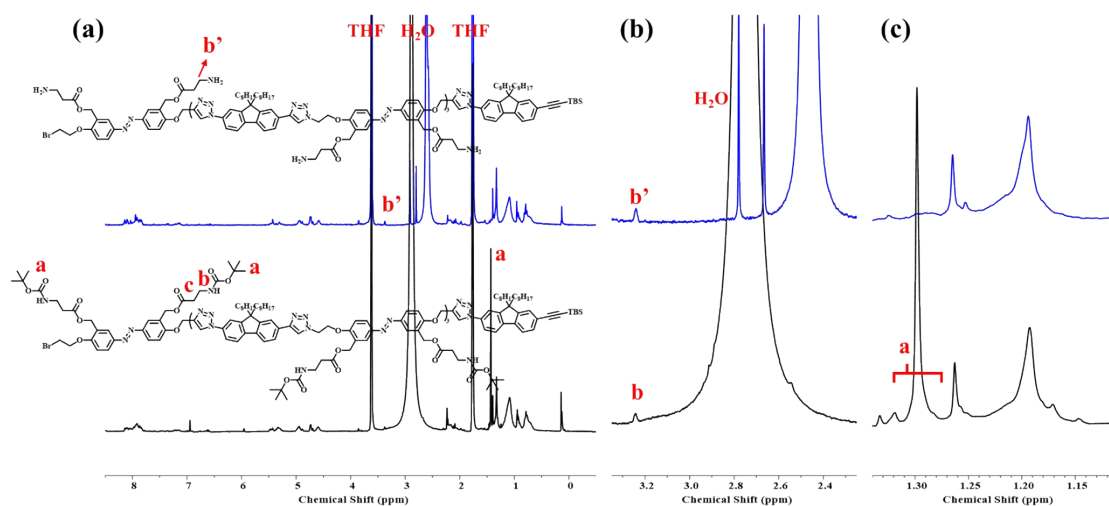

**Figure S7.** (a)  $^1\text{H}$  NMR spectra of 4(F-A)-8Boc and 4(F-A)-8NH<sub>2</sub> before and after hydrolysis in THF-*d*<sub>8</sub> and enlarged spectra in the range of (b) 3.3 ppm -2.3 ppm and (c) 1.4 ppm -1.1 ppm.

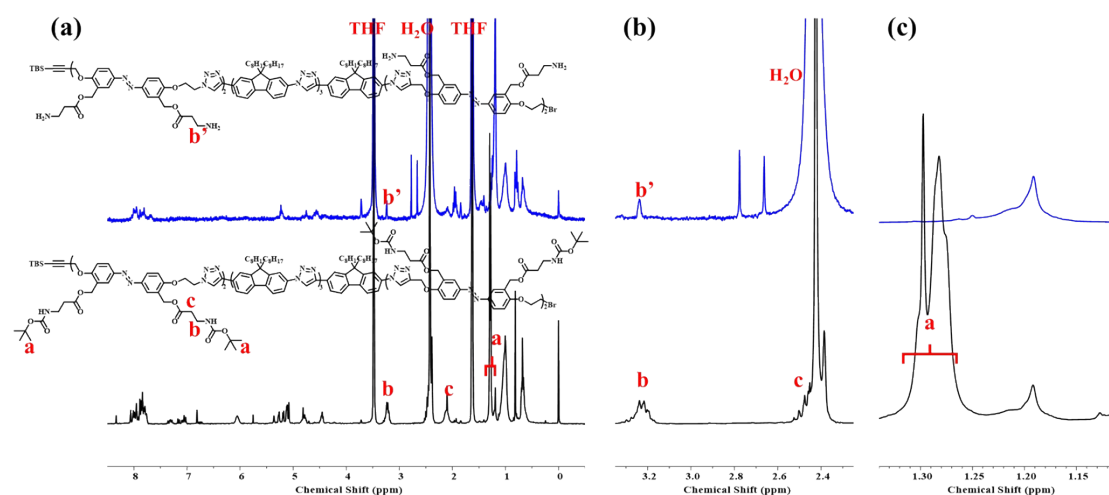

**Figure S8.** (a)  $^1\text{H}$  NMR spectra of 2Azo-4F-2Azo-8Boc and 2Azo-4F-2Azo-8NH<sub>2</sub> before and after hydrolysis in THF-*d*<sub>8</sub> and enlarged spectra in the range of (b) 3.3 ppm -2.3 ppm and (c) 1.4 ppm -1.1 ppm.

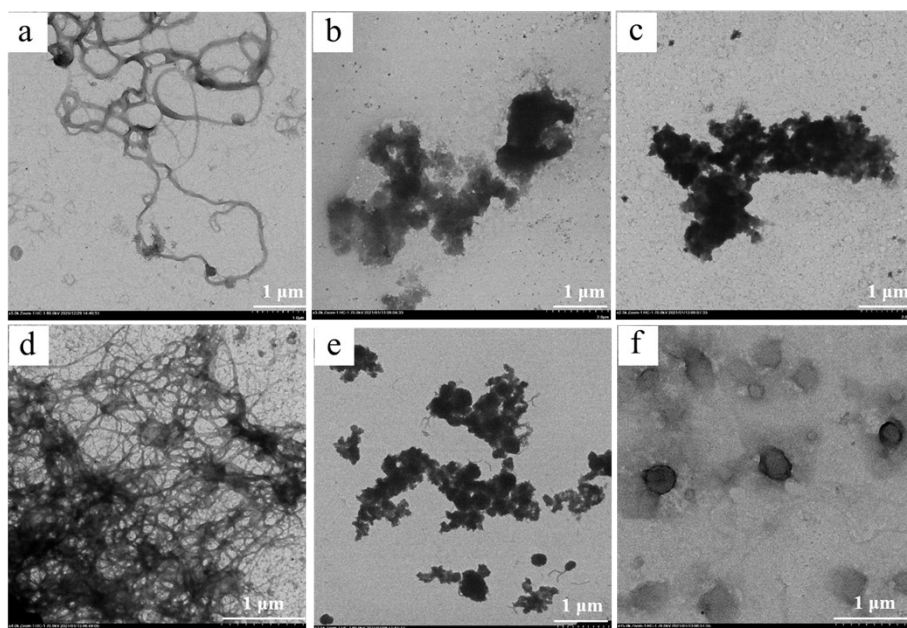

**Figure S9.** TEM images of assemblies of 4F-4Azo-8NH<sub>2</sub> assembled in THF/water/HCl systems with different volume fraction of THF/water/HCl and the concentration of hydrochloric acid aqueous solution. Assembly conditions: solvent ratio: (a) THF/water/HCl (1.0 M) (v/v/v) = 1:0.5:0.4, (b) THF/water/HCl (1.0 M) (v/v/v) = 1: 1: 0.4, (c) THF/water/HCl(1.0 M) (v/v/v) = 1: 2: 0.4; (d) THF/water/HCl (0.5 M) (v/v/v) = 1: 0.5: 0.4, (e) THF/water/HCl (2.0 M) (v/v/v) = 1:0.5:0.4, (f) THF/water/HCl (4.0 M) (v/v/v) = 1:0.5:0.4. Initial concentration:  $C_0 = 1.0$  mg/mL; drop speed: 0.2 mL/h; temperature: 30 °C; stirring speed: 300 r/min, standing still for 1 h.

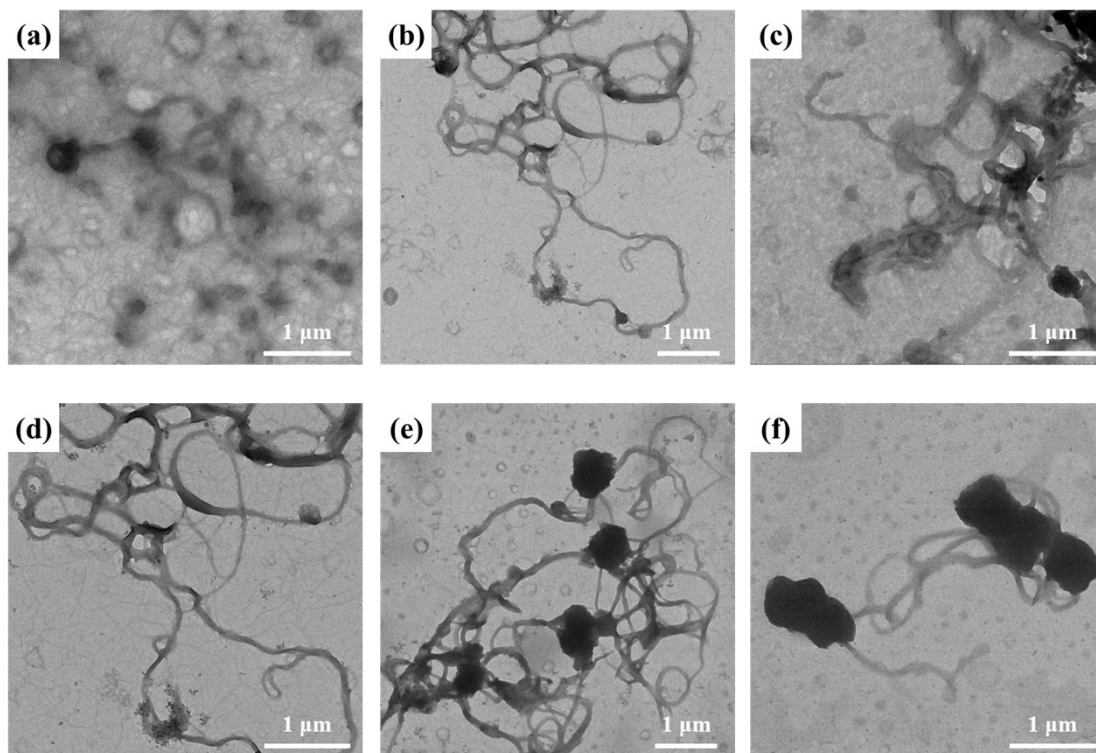

**Figure S10.** TEM images of the assemblies of 4F-4Azo-8NH<sub>2</sub> in THF/water/HCl (1.0M) at different aging times after completion of assembly. (a) 10 min, (b) 1 h, (c) 2 h, (d) 12 h, (e) 1day, (f) 3 days. Assembly conditions: solvent ratio: THF/water/HCl (1.0M) (v/v/v) = 1/0.5/0.4; initial concentration:  $C_0 = 1.0$  mg/mL; injection speed: 0.2 mL/h; temperature: 30 °C; stirring speed: 300 r/min.

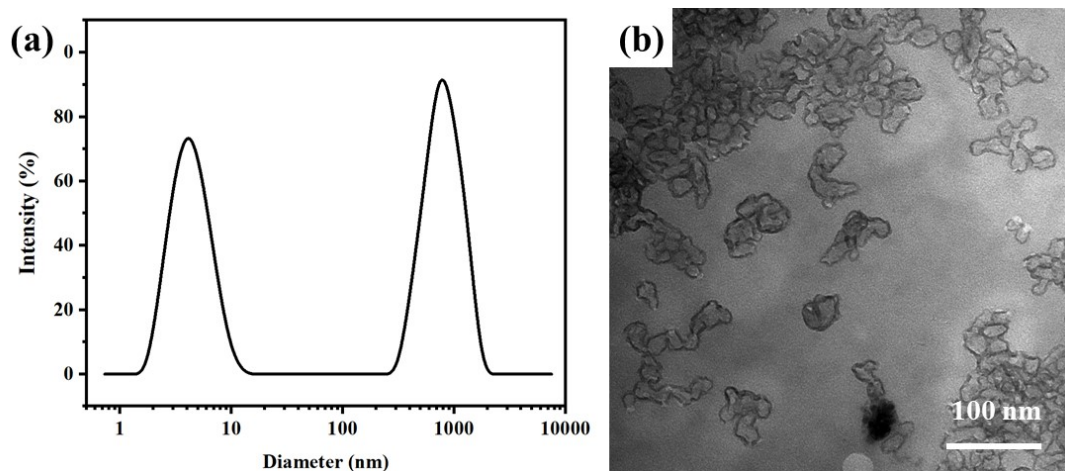

**Figure S11.** DLS curves of the assemblies of 2Azo-4F-2Azo-8NH<sub>2</sub> (a) and partial enlarged TEM images of smaller vesicles (b). Assembly conditions: solvent ratio: THF/water/HCl (1M) (v/v/v) = 1/0.5/0.4; initial concentration: C<sub>0</sub>=1.0 mg/mL; drop speed: 0.2 mL/h; temperature: 30 °C; stirring speed: 300 r/min.

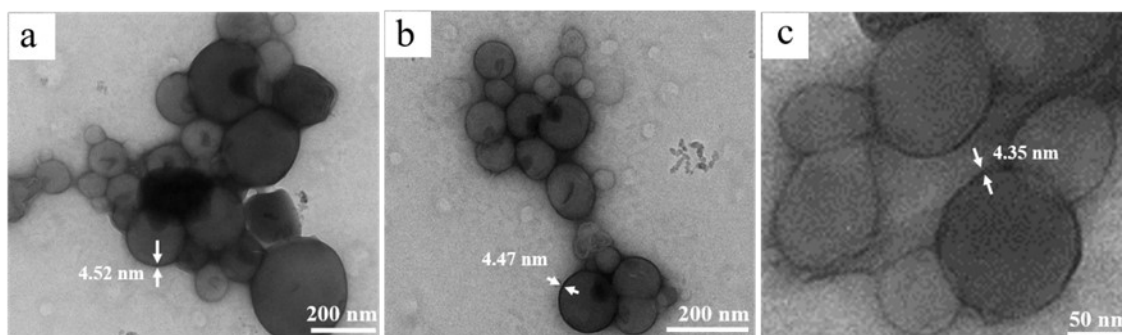

**Figure S12.** Enlarged TEM image of typical vesicles formed by 2Azo-4F-2Azo-8NH<sub>2</sub>. Assembly conditions: solvent ratio: THF/water/HCl (1.0 M) (v/v/v) = 1/0.5/0.4; initial concentration: C<sub>0</sub>=1.0 mg/mL; drop speed: 0.2 mL/h; temperature: 30 °C; stirring speed: 300 r/min.

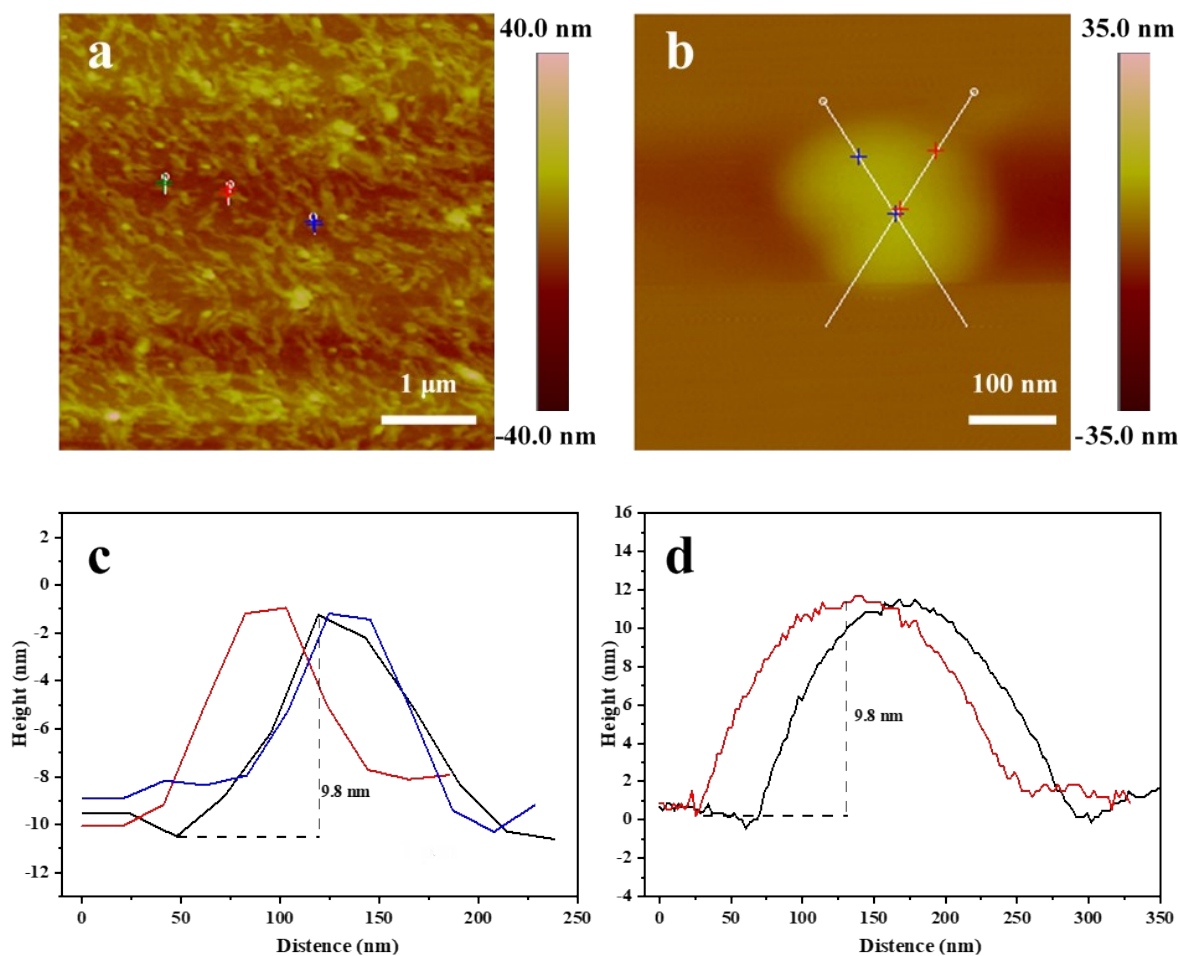

**Figure S13.** AFM images and height profile of the tiny fibers and vesicles obtained separately by assembly of 4F-4Azo-8NH<sub>2</sub> (a, c) and 2Azo-4F-2Azo-8NH<sub>2</sub> (b, d). Solvent ratio: THF/water/HCl (1.0 M) (v/v/v) = 1/0.5/0.4; initial concentration:  $C_0 = 1.0$  mg/mL; drop speed: 0.2 mL/h; temperature: 30 °C; stirring speed: 300 r/min.

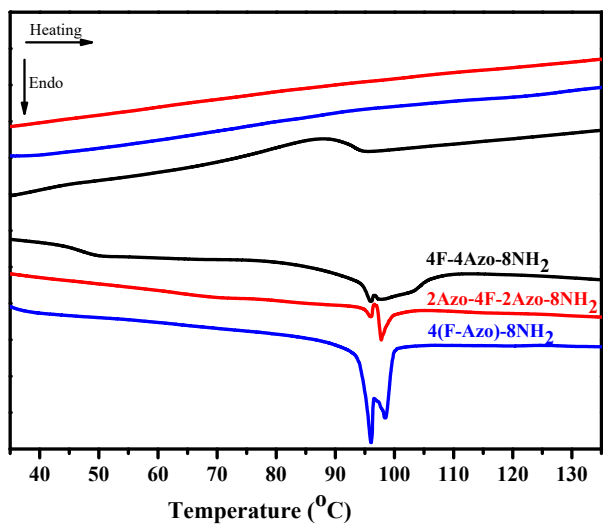

**Figure S14.** Second DSC heating curves of 4F-4Azo-8NH<sub>2</sub>, 2Azo-4F-2Azo-8NH<sub>2</sub> and 4(F-Azo)-8NH<sub>2</sub> with a heating rate of 10 °C/min in N<sub>2</sub>.

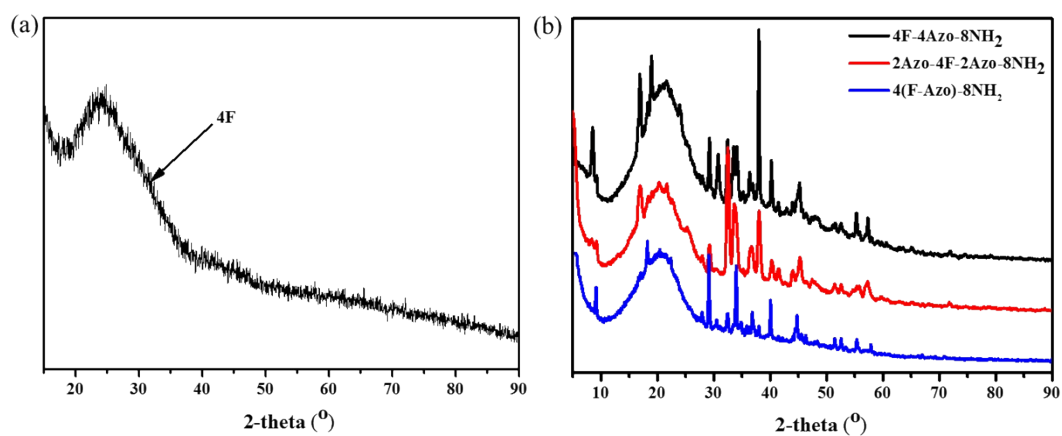

**Figure S15.** XRD spectra of 4F (a) and oligomers 4F-4Azo-8NH<sub>2</sub>, 2Azo-4F-2Azo-8NH<sub>2</sub>, 4(F-Azo)-8NH<sub>2</sub> (b).

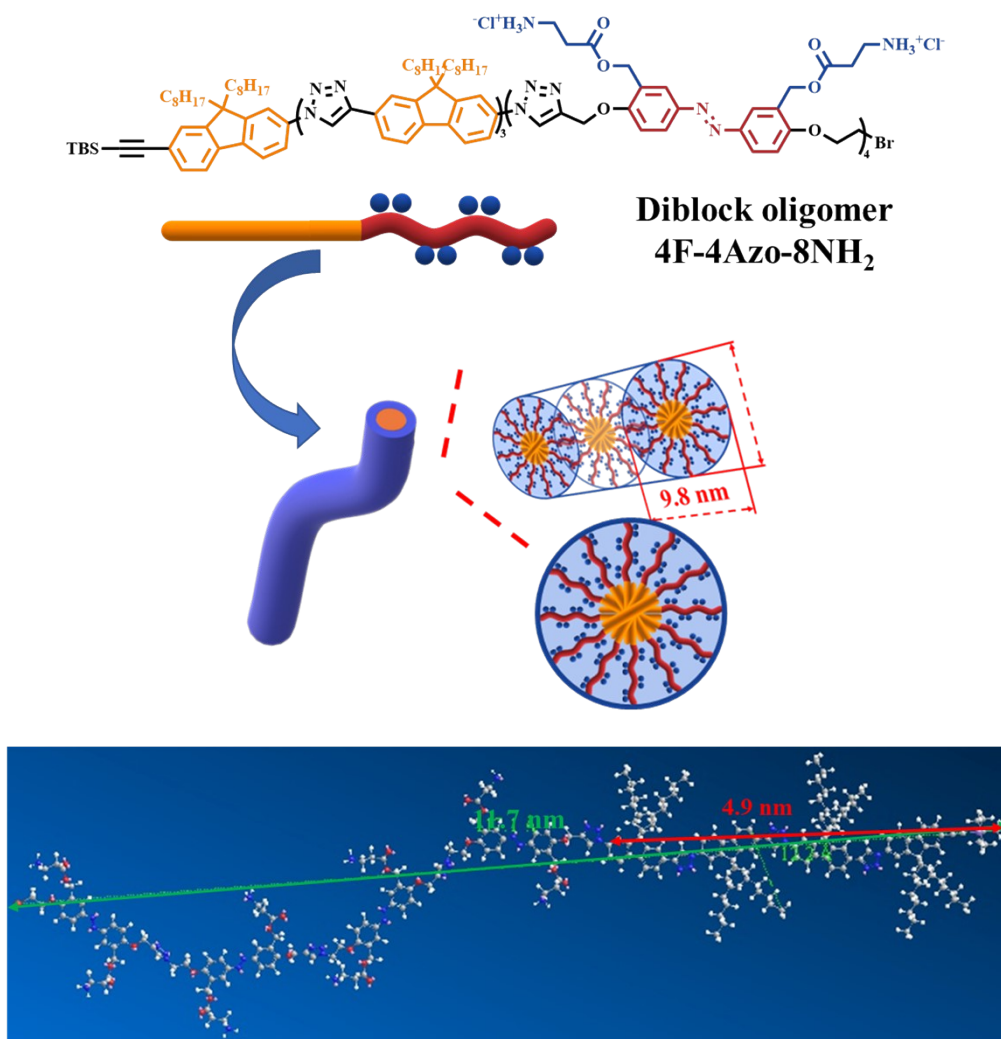

**Figure S16.** Schematic diagram of molecular stacking of fibers formed by the oligomer 4F-4Azo-8NH<sub>2</sub> during self-assembly in mixed solution THF/water/HCl (Top). The simulative molecular configuration of 4Azo-4F-8NH<sub>2</sub> calculated with Materials Studio software (MS). The molecular length of 4Azo-4F-8NH<sub>2</sub> is 11.7 nm, of which azobenzene block with amino side-chain groups is about 6.8 nm, and fluorene block is 4.9 nm (below).

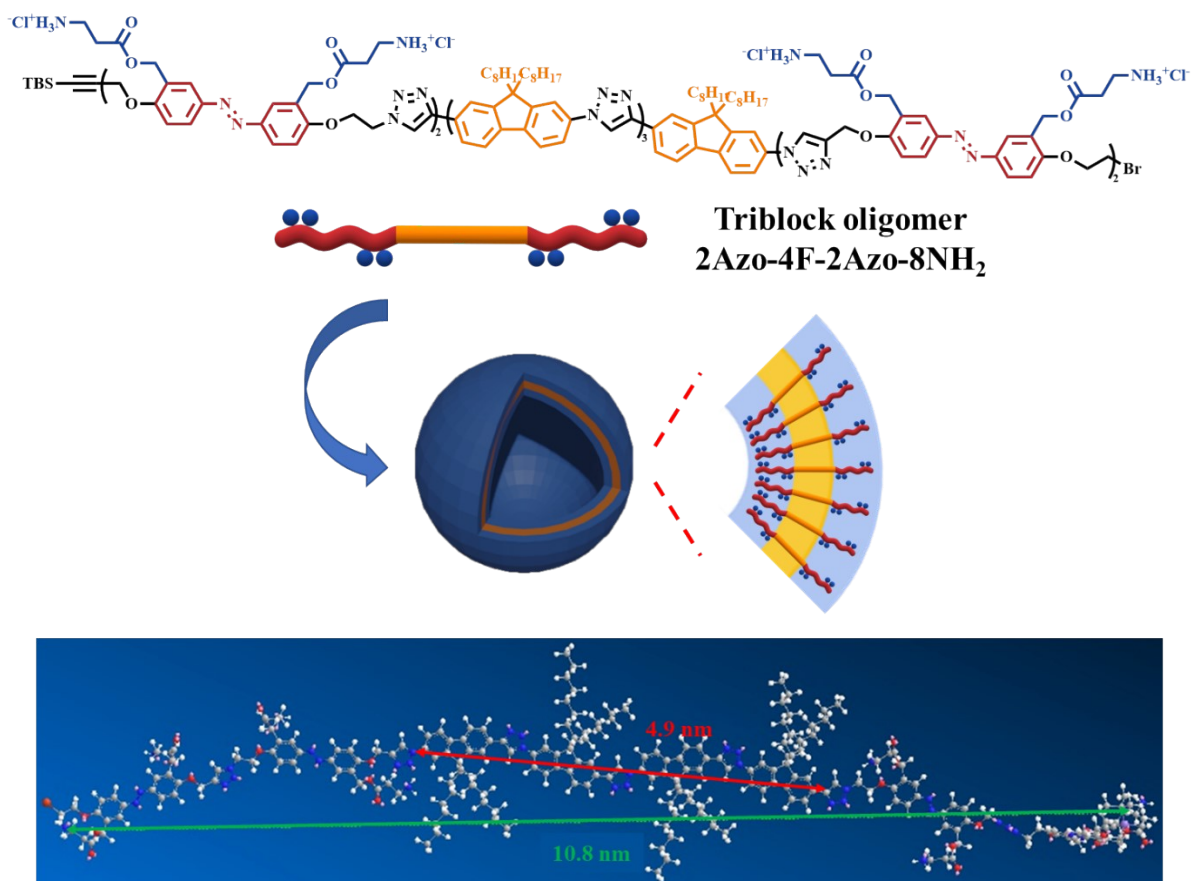

**Figure S17.** Schematic diagram of molecular stacking of vesicles formed by the oligomer 2Azo-4F-2Azo-8NH<sub>2</sub> during self-assembly in mixed solution THF/water/HCl (Top). The simulative molecular configuration of 2Azo-4F-2Azo-8NH<sub>2</sub> (b) calculated with Materials Studio software (MS). The molecular length of 2Azo-4F-2Azo-8NH<sub>2</sub> is 10.8 nm, of which two azobenzene blocks with amino side-chain groups is 2.95 nm respectively, and fluorene block is 4.9 nm (below).



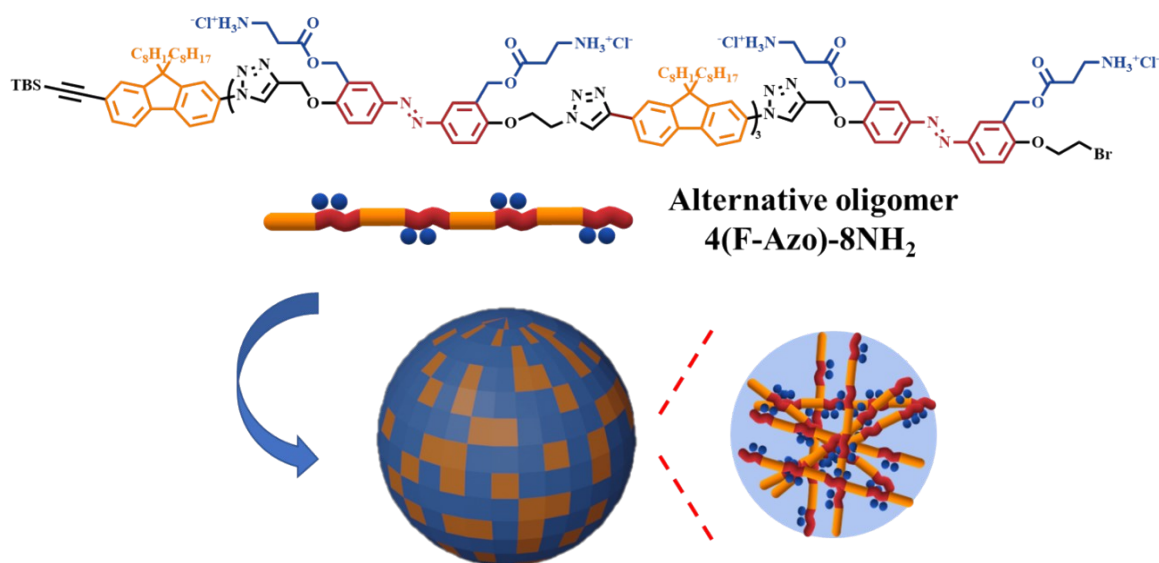

**Figure S18.** Schematic diagram of molecular stacking of micellar complex formed by the oligomer 4(F-Azo)-8NH<sub>2</sub> during self-assembly in mixed solution THF/water/HCl

## References

[S1] Min Liu, Xianheng Shi, Lishan Li, Jiandong Zhang, Zhihao Huang, Wei Zhang, Nianchen Zhou,\* Zhengbiao Zhang,\* and Xiulin Zhu, Synthesis of Discrete Conjugated Fluorene-Azo Oligomers for the Investigation of Azobenzene Position-Dependent Physical Properties and Photoresponsive Behavior, *Macromol. Chem. Phys.*, **2021**, 2100092.

[S2] An Hu, Xianheng Shi, Lishan Li,\* Wei Zhang, Zhengbiao Zhang,\* Nianchen Zhou,\* and Xiulin Zhu, A Consequence of Dispersity on the Self-Assembly of Amphiphilic Homopolymers Containing Main-Chain Azobenzene, *Macromol. Chem. Phys.*, **2021**, 2100202.
